# Supplementary material for: Nuclearity growth towards Ni(ii) cubane in self-assembly with 2-hydroxymethyl pyridine (hmpH) and 5-ethoxycarbonyl-2-hydroxymethyl pyridine (5-ehmpH)
Source: Royal Society of Chemistry journal article supplement (doi:10.1039/c0ce00831a), 2011-01-01
Supplement: c0ce00831a.pdf [file c0ce00831a.pdf]

Electronic Supplementary Information for

**Nuclearity Growth Towards Ni(II) Cubane in Self-Assembly with 2-Hydroxymethyl Pyridine (hmpH) and 5-Ethoxycarbonyl-2-hydroxymethyl Pyridine (5-ehmpH)**

Wen-Hua Zhang, Norlela Binte Sulaiman, P. X. Shaun Tio and T. S. Andy Hor

**Table S1** Selected bond distances (Å) and angles (°) for **1**

---

|                   |           |                   |           |
|-------------------|-----------|-------------------|-----------|
| Ni(1)-O(1)        | 2.057(3)  | Ni(1)-O(2)        | 2.052(3)  |
| Ni(1)-N(1)        | 2.065(3)  |                   |           |
| O(2)-Ni(1)-O(1)   | 88.33(12) | O(2)-Ni(1)-N(1)   | 92.22(12) |
| O(1)-Ni(1)-N(1)   | 78.70(12) | O(2)#1-Ni(1)-O(2) | 86.64(17) |
| O(1)-Ni(1)-O(1)#1 | 96.76(16) | O(2)#1-Ni(1)-N(1) | 99.45(13) |
| O(1)#1-Ni(1)-N(1) | 90.61(11) |                   |           |

Symmetry Code: #1:  $-x + 1, y, -z + 1/2$ .

---

**Table S2** Selected bond distances (Å) and angles (°) for **2**

---

|                     |           |                      |           |
|---------------------|-----------|----------------------|-----------|
| Ni(1)-O(1)          | 2.022(1)  | Ni(1)-O(2)           | 2.029(1)  |
| Ni(1)-O(3)          | 2.021(1)  | Ni(1)-N(1)           | 2.049(2)  |
| Ni(1)-O(5)          | 2.078(1)  | Ni(1)-O(1)#1         | 2.107(1)  |
| Ni(2)-O(6)#1        | 2.012(2)  | Ni(2)-O(1)#1         | 2.016(1)  |
| Ni(2)-O(2)          | 2.018(1)  | Ni(2)-N(2)           | 2.036(2)  |
| Ni(2)-O(2)#1        | 2.120(1)  | Ni(2)-O(4)           | 2.123(1)  |
| O(3)-Ni(1)-O(2)     | 92.63(6)  | O(1)-Ni(1)-N(1)      | 80.82(6)  |
| O(1)-Ni(1)-O(2)     | 87.95(6)  | O(3)-Ni(1)-N(1)      | 99.12(6)  |
| O(3)-Ni(1)-O(5)     | 100.99(6) | O(1)-Ni(1)-O(5)      | 92.44(6)  |
| O(2)-Ni(1)-O(5)     | 85.07(6)  | N(1)-Ni(1)-O(5)      | 91.81(6)  |
| O(3)-Ni(1)-O(1)#1   | 90.48(6)  | O(1)-Ni(1)-O(1)#1    | 76.19(6)  |
| O(2)-Ni(1)-O(1)#1   | 84.81(5)  | N(1)-Ni(1)-O(1)#1    | 95.88(6)  |
| O(6)#1-Ni(2)-O(1)#1 | 94.22(6)  | O(1)#1-Ni(2)-O(2)    | 87.52(6)  |
| O(6)#1-Ni(2)-N(2)   | 99.05(6)  | N(2)-Ni(2)-O(4)      | 87.44(6)  |
| O(2)-Ni(2)-N(2)     | 80.96(6)  | O(6)#1-Ni(2)-O(2)#1  | 90.34(6)  |
| O(1)#1-Ni(2)-O(2)#1 | 85.66(5)  | O(2)-Ni(2)-O(2)#1    | 75.91(6)  |
| N(2)-Ni(2)-O(2)#1   | 99.72(6)  | O(6)#1-Ni(2)-O(4)    | 103.06(6) |
| O(1)#1-Ni(2)-O(4)   | 84.16(6)  | O(2)-Ni(2)-O(4)      | 90.94(6)  |
| Ni(2)#1-O(1)-Ni(1)  | 92.95(6)  | Ni(2)#1-O(1)-Ni(1)#1 | 91.26(6)  |
| Ni(1)-O(1)-Ni(1)#1  | 103.20(6) | Ni(2)-O(2)-Ni(1)     | 93.49(6)  |
| Ni(2)-O(2)-Ni(2)#1  | 103.38(6) | Ni(1)-O(2)-Ni(2)#1   | 89.71(6)  |

Symmetry Code: #1  $-x + 1, y, -z + 1/2$ .

---

**Table S3** Selected bond distances (Å) and angles (°) for **3**

---

|                   |           |                   |          |
|-------------------|-----------|-------------------|----------|
| Ni(1)-O(1)        | 2.063(6)  | Ni(1)-N(2)        | 2.064(7) |
| Ni(1)-O(4)        | 2.069(6)  | Ni(1)-N(1)        | 2.083(8) |
| Ni(1)-Br(1)       | 2.544(2)  | Ni(1)-Br(2)       | 2.552(1) |
| Ni(2)-N(3)        | 2.061(7)  | Ni(2)-O(7)        | 2.062(6) |
| Ni(2)-N(4)        | 2.076(7)  | Ni(2)-O(10)       | 2.083(6) |
| Ni(2)-Br(2)       | 2.554(1)  | Ni(2)-Br(1)       | 2.592(1) |
| O(1)-Ni(1)-N(2)   | 89.1(3)   | O(1)-Ni(1)-O(4)   | 89.5(3)  |
| N(2)-Ni(1)-O(4)   | 78.6(3)   | O(1)-Ni(1)-N(1)   | 77.7(3)  |
| O(4)-Ni(1)-N(1)   | 93.6(3)   | N(2)-Ni(1)-Br(1)  | 94.6(2)  |
| O(4)-Ni(1)-Br(1)  | 92.36(19) | N(1)-Ni(1)-Br(1)  | 98.8(2)  |
| O(1)-Ni(1)-Br(2)  | 91.8(2)   | N(2)-Ni(1)-Br(2)  | 99.5(2)  |
| N(1)-Ni(1)-Br(2)  | 88.6(2)   | O(7)-Ni(2)-N(4)   | 90.7(3)  |
| Br(1)-Ni(1)-Br(2) | 86.41(4)  | N(3)-Ni(2)-O(7)   | 78.9(3)  |
| N(3)-Ni(2)-O(10)  | 87.8(3)   | O(7)-Ni(2)-O(10)  | 92.8(3)  |
| N(4)-Ni(2)-O(10)  | 78.2(3)   | N(3)-Ni(2)-Br(2)  | 98.6(2)  |
| N(4)-Ni(2)-Br(2)  | 93.40(19) | Br(2)-Ni(2)-Br(1) | 85.35(4) |
| O(10)-Ni(2)-Br(2) | 93.89(17) | N(3)-Ni(2)-Br(1)  | 94.0(2)  |
| O(7)-Ni(2)-Br(1)  | 88.0(2)   | N(4)-Ni(2)-Br(1)  | 100.2(2) |

---

**Table S4** Selected bond distances (Å) and angles (°) for **4**

---

|                 |          |                 |          |
|-----------------|----------|-----------------|----------|
| Ni(1)-O(1)      | 2.039(9) | Ni(1)-N(1)      | 2.048(8) |
| Ni(1)-O(4)      | 2.071(7) | Ni(1)-O(7)      | 2.069(9) |
| Ni(1)-N(3)      | 2.076(8) | Ni(1)-N(2)      | 2.086(8) |
| O(1)-Ni(1)-N(1) | 78.8(3)  | O(1)-Ni(1)-O(4) | 93.1(4)  |
| N(1)-Ni(1)-O(4) | 93.2(3)  | O(7)-Ni(1)-N(3) | 79.4(3)  |
| N(1)-Ni(1)-O(7) | 93.9(3)  | O(4)-Ni(1)-O(7) | 88.0(3)  |
| O(1)-Ni(1)-N(3) | 100.6(3) | N(1)-Ni(1)-N(3) | 97.5(3)  |
| O(1)-Ni(1)-N(2) | 92.4(3)  | N(3)-Ni(1)-N(2) | 93.4(3)  |
| O(4)-Ni(1)-N(2) | 77.7(3)  | O(7)-Ni(1)-N(2) | 94.9(3)  |

---

**Table S5** Selected bond distances (Å) and angles (°) for **5**

---

|                      |          |                     |           |
|----------------------|----------|---------------------|-----------|
| Ni(1)-O(1)           | 2.044(2) | Ni(1)-O(1)#1        | 2.051(1)  |
| Ni(1)-O(4)           | 2.060(2) | Ni(1)-N(1)          | 2.064 (2) |
| Ni(1)-O(1)#2         | 2.107(2) | Ni(1)-Br(1)         | 2.524(1)  |
| O(1)-Ni(1)-O(1)#1    | 82.56(6) | O(1)-Ni(1)-O(4)     | 97.18(6)  |
| O(1)#1-Ni(1)-O(4)    | 87.30(6) | O(1)-Ni(1)-N(1)     | 79.76(6)  |
| O(4)-Ni(1)-N(1)      | 90.13(7) | N(1)-Ni(1)-O(1)#2   | 100.30(6) |
| O(1)-Ni(1)-O(1)#2    | 79.33(6) | O(1)#1-Ni(1)-O(1)#2 | 81.03(6)  |
| O(1)#1-Ni(1)-Br(1)   | 99.36(4) | O(1)#2-Ni(1)-Br(1)  | 96.11(4)  |
| O(4)-Ni(1)-Br(1)     | 87.80(5) | N(1)-Ni(1)-Br(1)    | 98.67(5)  |
| Ni(1)-O(1)-Ni(1)#3   | 98.21(6) | Ni(1)-O(1)-Ni(1)#2  | 100.47(6) |
| Ni(1)#3-O(1)-Ni(1)#2 | 96.21(6) |                     |           |

Symmetry Codes: #1:  $-y + 5/4, x + 1/4, -z + 5/4$ ; #2:  $-x + 1, -y + 3/2, z$ .

---

**Table S6** Selected bond distances (Å) and angles (°) for **6**

---

|                    |           |                    |           |
|--------------------|-----------|--------------------|-----------|
| Ni(1)-O(9)         | 2.040(2)  | Ni(1)-O(7)         | 2.047(2)  |
| Ni(1)-O(4)         | 2.057(2)  | Ni(1)-O(1)#1       | 2.066(2)  |
| Ni(1)-N(1)         | 2.070(2)  | Ni(1)-O(1)         | 2.104(2)  |
| Ni(2)-O(1W)        | 2.015(2)  | Ni(2)-O(8)         | 2.034(2)  |
| Ni(2)-N(2)         | 2.058(2)  | Ni(2)-O(1)         | 2.064(2)  |
| Ni(2)-O(4)         | 2.068(2)  | Ni(2)-O(4)#1       | 2.085(2)  |
| O(9)-Ni(1)-O(7)    | 89.50(8)  | O(9)-Ni(1)-O(4)    | 105.85(8) |
| O(7)-Ni(1)-O(4)    | 91.37(8)  | O(9)-Ni(1)-O(1)#1  | 99.41(8)  |
| O(4)-Ni(1)-O(1)#1  | 78.75(8)  | O(1)#1-Ni(1)-N(1)  | 99.51(9)  |
| O(9)-Ni(1)-N(1)    | 88.40(9)  | O(7)-Ni(1)-N(1)    | 88.45(9)  |
| O(7)-Ni(1)-O(1)    | 94.58(8)  | O(4)-Ni(1)-O(1)    | 86.88(7)  |
| O(1)#1-Ni(1)-O(1)  | 78.51(8)  | N(1)-Ni(1)-O(1)    | 78.94(8)  |
| O(1W)-Ni(2)-O(8)   | 95.01(9)  | N(2)-Ni(2)-O(4)#1  | 100.12(8) |
| O(1W)-Ni(2)-N(2)   | 93.59(9)  | O(8)-Ni(2)-N(2)    | 87.77(9)  |
| O(1W)-Ni(2)-O(1)   | 98.53(8)  | O(8)-Ni(2)-O(1)    | 93.04(8)  |
| O(8)-Ni(2)-O(4)    | 94.78(8)  | N(2)-Ni(2)-O(4)    | 80.09(8)  |
| O(1)-Ni(2)-O(4)    | 87.64(7)  | O(1W)-Ni(2)-O(4)#1 | 89.62(8)  |
| O(1)-Ni(2)-O(4)#1  | 78.17(8)  | O(4)-Ni(2)-O(4)#1  | 81.68(9)  |
| Ni(2)-O(1)-Ni(1)#1 | 101.73(8) | Ni(2)-O(1)-Ni(1)   | 88.55(7)  |
| Ni(1)#1-O(1)-Ni(1) | 101.44(8) | Ni(1)-O(4)-Ni(2)   | 89.72(7)  |
| Ni(1)-O(4)-Ni(2)#1 | 101.34(8) | Ni(2)-O(4)-Ni(2)#1 | 98.26(9)  |

Symmetry Codes: #1:  $-x + 1, y, -z + 1/2$ .

---

**Figure S1.** Crystal Structure of  $[\text{Ni}_4(\text{hmp})_4(\mu\text{-OAc})_2(\text{OAc})_2(\text{MeOH})_2]\cdot 1.4(\text{H}_2\text{O})$  with all disordered moieties, hydrogen atoms and solvent molecules omitted for clarity.

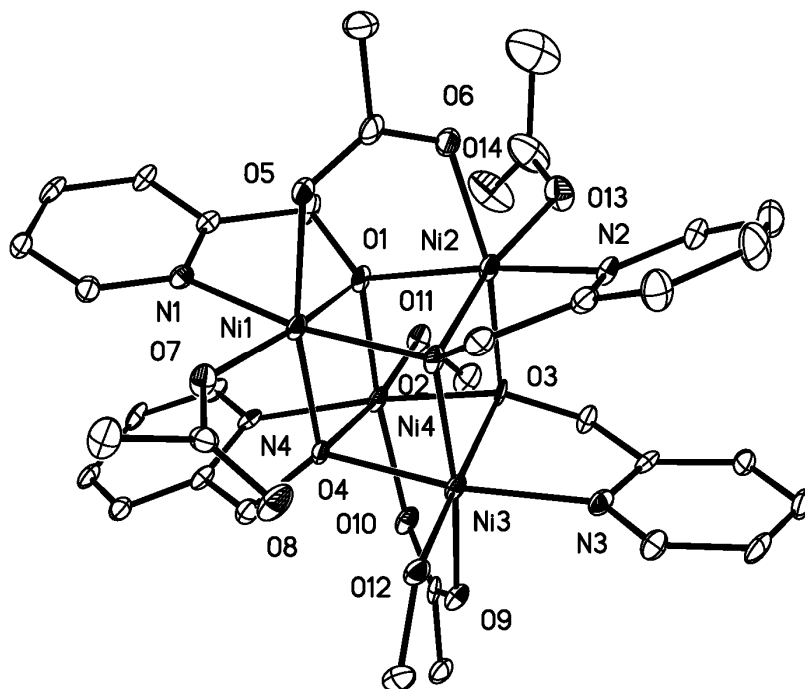

**Table S7.** Crystallographic data and structure refinement for  $[\text{Ni}_4(\text{hmp})_4(\mu\text{-OAc})_2(\text{OAc})_2(\text{MeOH})_2] \cdot 1.4(\text{H}_2\text{O})$

|                                                                             |                                                                  |
|-----------------------------------------------------------------------------|------------------------------------------------------------------|
| formula                                                                     | $\text{C}_{34}\text{H}_{44}\text{N}_4\text{Ni}_4\text{O}_{15.4}$ |
| fw                                                                          | 989.57                                                           |
| cryst. sys.                                                                 | monoclinic                                                       |
| spacegroup                                                                  | $C2/c$                                                           |
| $a(\text{\AA})$                                                             | 39.642(6)                                                        |
| $b(\text{\AA})$                                                             | 10.6741(15)                                                      |
| $c(\text{\AA})$                                                             | 19.194(3)                                                        |
| $\alpha(^{\circ})$                                                          | 90                                                               |
| $\beta(^{\circ})$                                                           | 94.065(4)                                                        |
| $\gamma(^{\circ})$                                                          | 90                                                               |
| $V(\text{\AA}^3)$                                                           | 8102(2)                                                          |
| $T/\text{K}$                                                                | 100(2)                                                           |
| $Z$                                                                         | 8                                                                |
| $D_{\text{calc}}(\text{g}\cdot\text{cm}^{-3})$                              | 1.623                                                            |
| $\mu(\text{mm}^{-1})$                                                       | 1.903                                                            |
| $F_{000}$                                                                   | 4088                                                             |
| collected reflns                                                            | 22945                                                            |
| uniq. reflns                                                                | 7141                                                             |
| $R_{\text{int}}$                                                            | 0.0600                                                           |
| parameters                                                                  | 541                                                              |
| $R^a(I > 2\sigma(I))$                                                       | 0.0562                                                           |
| $wR^b$                                                                      | 0.1310                                                           |
| $GOF^c$                                                                     | 1.087                                                            |
| $\Delta\rho_{\text{max}}/\Delta\rho_{\text{min}} (\text{e}\text{\AA}^{-3})$ | 0.793 / -0.606                                                   |

<sup>a</sup>  $R_1 = \Sigma||F_o| - |F_c|| / \Sigma|F_o|$ . <sup>b</sup>  $wR_2 = \{\Sigma w(|F_o| - |F_c|)^2 / \Sigma w|F_o|^2\}^{1/2}$ . <sup>c</sup>  $GOF = \{\Sigma w(|F_o| - |F_c|)^2 / (n - p)\}^{1/2}$ , where  $n$  is the number of reflections and  $p$  is total number of parameters refined
